# Supplementary material for: ETV7 regulates breast cancer stem-like cell features by repressing IFN-response genes
Source: PubMed Central journal article supplement (PMC8316333; doi:10.1038/s41419-021-04005-y), 2021-07-27
Supplement: 41419_2021_4005_MOESM2_ESM.pdf [file 41419_2021_4005_MOESM2_ESM.pdf]

**Supplementary Table 1:** Sequences of primers used for RT-qPCR.

| <b>Gene symbol</b>    | <b>Forward primer</b>  | <b>Reverse primer</b>     |
|-----------------------|------------------------|---------------------------|
| ETV7                  | CAAGATCTTCCGAGTTGTGGA  | ACGACCAACACTGGGATGAT      |
| IFITM2                | CGCGTACTCCGTGAAGTCTA   | G TTCACCCGGTTCTTGTGAT     |
| IFI35                 | TGAGAGAGACCACAGCCCTT   | GGAGGGCGGCATCCAGT         |
| HERC6                 | GGAGCTGCCAGAACCAATTC   | AAGACCCTTCCTTTGTGGCA      |
| PROCR                 | CTCGGTATGAACTGCGGGAA   | TTGTTTGGCTCCCTTTCGTG      |
| APOL6                 | TTTCTCCAGCCCAGACACTC   | TCAAATGATTTTCTTCTCTCCACGG |
| CASP4                 | CTGTTCCCTATGGCAGAAGGC  | TCTGCCATGACCCGAAC TTT     |
| CFB                   | GACACGAGAGCTGTATGGGG   | CTTCTCCCCTCCTACGCTGA      |
| PARP14                | TGCCAAGAATGGCCAGACAA   | TATGCCACAGCATTCTTTCCG     |
| ICAM1                 | ATGGCAACGACTCCTTCTCG   | GCCGAAAGCTGTAGATGGT       |
| ABCB1                 | TGCCTATGGAGACAACAGCC   | TGAAGGCATGTATGTTGGCCT     |
| ABCC1                 | CCCGCTCTGGGACTGGAA     | GTAGAAGGGGAAACAGGCC       |
| ABCG2                 | TCAGCTGGTTATCACTGTGAGG | GGCTCTATGATCTCTGTGGCT     |
| CD44                  | AGCACAATCCAGGCAACTCC   | CTGGTATGAGCTGAGGCTGC      |
| CD24                  | GCTCCTACCCACGCAGATTTAT | GCCTTGGTGGTGGCATTAGT      |
| YWHAZ, reference gene | CAACACATCCTATCAGACTGGG | AATGTATCAAGTTCAGCAATGGC   |
| GAPDH, reference gene | TCCAAAATCAAGTGGGGCGA   | AGTAGAGGCAGGGATGATGT      |
